# Supplementary material for: Pricing of indirect emissions accelerates low-carbon transition of US light vehicle sector
Source: Research Square preprint supplement (doi:10.21203/rs.3.rs-334331/v1), 2021-03-25
Supplement: Supplementary file 1 [file 0cb7da33a2ed16e298db6f17.xlsx]

## Sheet: 0 info
P. Wolfram, S. Weber, K. Gillingham, E. Hertwich (2020). Whole-supply-chain perspective accelerates low-carbon transition of US light vehicle sector. Nature Energy.
This electronic supplementary material provides the most important input data and all results presented in Wolfram et al. (2020) "Whole-supply-chain perspective accelerates low-carbon transition of US light vehicle sector", Nature Energy.
	Section		Content
	Input data		Supplementary Table	1		Vehicle characteristics: vehicle weights, battery capacities, fuel economies, VKT
	Input data		Supplementary Table	2		Vehicle assembly energy use
	Input data		Supplementary Table	3		Vehicle material composition
	Input data		Supplementary Table	4		Material CO2 emission factors
	Input data		Supplementary Table	5		Energy CO2 emission factors
	Input data		Supplementary Table	6		Reuse energy factors
	Input data		Supplementary Table	7		Assumed rates of components reuse
	Input data		Supplementary Table	8		Assumed content of recycled materials
	Input data		Supplementary Table	9		Assumed carbon tax
	Input data		Supplementary Table	10		Assumed feebates
	Results		Supplementary Table	11		Degree of deployed lightweighting
	Results		Supplementary Table	12		Fleet fuel economy
	Results		Supplementary Table	13		Vehicle purchase prices and energy prices
	Results		Supplementary Table	14		Vehicle miles travelled
	Results		Supplementary Table	15		Total fleet material use
	Results		Supplementary Table	16		Direct and indirect CO2 emissions
	Results		Supplementary Table	17		Co-benefits and trade-offs
	Results		Supplementary Table	18		Electricity supply
	Results		Supplementary Table	19		Vehicle sales
	Results		Supplementary Table	20		Specific life-cycle emissions by phase
	Results		Supplementary Table	21		Fleet energy use

## Sheet: 1 veh chars
Vehicle weights and battery characteristics
		2010	2011	2012	2013	2014	2015	2016	2017	2018	2019	2020	2021	2022	2023	2024	2025	2026	2027	2028	2029	2030	2031	2032	2033	2034	2035	2036	2037	2038	2039	2040	2041	2042	2043	2044	2045	2046	2047	2048	2049	2050
Baseline vehicle weights, kg
	ICEV PC	1578.47	1602.54	1583.68	1588.46	1593.95	1590.42	1558.86	1549.77	1541.87	1530.41	1510.06	1489.88	1462.45	1429.77	1415.81	1378.77	1378.77	1378.83	1378.85	1378.81	1378.78	1378.77	1378.78	1378.85	1378.79	1378.81	1378.76	1378.82	1378.82	1378.78	1378.8	1378.81	1378.83	1378.82	1378.82	1378.82	1378.82	1378.81	1378.83	1378.83	1378.78
	ICEV LT	1964.82	2036.62	2043.38	2038.35	2044.59	2021.11	1993.67	1981	1969.45	1959.41	1944.85	1918.99	1893.35	1858.48	1816.95	1799.22	1752.15	1752.15	1752.22	1752.24	1752.19	1752.15	1752.15	1752.15	1752.24	1752.17	1752.2	1752.12	1752.21	1752.2	1752.16	1752.19	1752.19	1752.21	1752.21	1752.2	1752.2	1752.2	1752.19	1752.22	1752.23
	HEV PC	1588.71	1612.94	1593.96	1598.77	1604.29	1600.74	1568.97	1559.82	1551.87	1540.34	1519.86	1499.55	1471.94	1439.04	1425	1387.72	1387.72	1387.78	1387.8	1387.76	1387.73	1387.72	1387.72	1387.79	1387.74	1387.76	1387.7	1387.77	1387.76	1387.73	1387.75	1387.76	1387.77	1387.77	1387.76	1387.76	1387.76	1387.76	1387.78	1387.78	1387.73
	HEV LT	1977.57	2049.84	2056.64	2051.57	2057.86	2034.22	2006.61	1993.85	1982.23	1972.12	1957.47	1931.44	1905.63	1870.54	1828.74	1810.89	1763.52	1763.52	1763.59	1763.61	1763.56	1763.52	1763.52	1763.52	1763.61	1763.54	1763.57	1763.49	1763.58	1763.57	1763.53	1763.55	1763.56	1763.58	1763.58	1763.57	1763.57	1763.57	1763.56	1763.59	1763.6
	PHEV-10 PC	1614.31	1638.93	1619.65	1624.54	1630.14	1626.54	1594.26	1584.96	1576.88	1565.17	1544.36	1523.72	1495.66	1462.23	1447.96	1410.08	1410.08	1410.15	1410.16	1410.12	1410.09	1410.08	1410.09	1410.16	1410.1	1410.13	1410.07	1410.13	1410.13	1410.09	1410.11	1410.12	1410.14	1410.13	1410.13	1410.13	1410.13	1410.12	1410.15	1410.15	1410.09
	PHEV-10 LT	2009.44	2082.87	2089.78	2084.64	2091.02	2067	2038.95	2025.99	2014.17	2003.9	1989.02	1962.57	1936.34	1900.69	1858.21	1840.07	1791.94	1791.93	1792.02	1792.04	1791.98	1791.94	1791.93	1791.94	1792.03	1791.96	1791.99	1791.91	1792	1791.99	1791.95	1791.98	1791.98	1792.01	1792	1791.99	1791.99	1791.99	1791.98	1792.02	1792.02
	PHEV-40 PC	1694.75	1720.59	1700.35	1705.48	1711.37	1707.58	1673.69	1663.93	1655.45	1643.15	1621.31	1599.64	1570.18	1535.09	1520.11	1480.34	1480.34	1480.41	1480.42	1480.38	1480.35	1480.34	1480.34	1480.42	1480.36	1480.39	1480.32	1480.39	1480.39	1480.35	1480.37	1480.38	1480.4	1480.4	1480.39	1480.39	1480.39	1480.38	1480.41	1480.41	1480.35
	PHEV-40 LT	2109.56	2186.65	2193.9	2188.5	2195.21	2170	2140.54	2126.93	2114.53	2103.75	2088.12	2060.36	2032.82	1995.39	1950.8	1931.76	1881.22	1881.22	1881.3	1881.33	1881.27	1881.23	1881.22	1881.22	1881.32	1881.25	1881.28	1881.2	1881.29	1881.28	1881.23	1881.26	1881.27	1881.29	1881.29	1881.28	1881.28	1881.28	1881.27	1881.3	1881.31
	BEV-100 PC	1616.25	1644.35	1622.34	1627.92	1634.32	1630.21	1593.35	1582.74	1573.52	1560.14	1536.38	1512.82	1480.79	1442.62	1426.33	1383.08	1383.08	1383.16	1383.17	1383.13	1383.09	1383.08	1383.09	1383.17	1383.11	1383.13	1383.06	1383.14	1383.13	1383.09	1383.12	1383.13	1383.15	1383.14	1383.14	1383.13	1383.13	1383.13	1383.15	1383.16	1383.09
	BEV-100 LT	2067.37	2151.2	2159.09	2153.21	2160.5	2133.09	2101.05	2086.25	2072.77	2061.04	2044.05	2013.85	1983.91	1943.2	1894.7	1874	1819.04	1819.04	1819.13	1819.16	1819.1	1819.05	1819.04	1819.05	1819.15	1819.07	1819.1	1819.02	1819.11	1819.1	1819.05	1819.09	1819.09	1819.12	1819.12	1819.11	1819.11	1819.1	1819.1	1819.13	1819.13
	BEV-200 PC	1871.83	1903.83	1878.76	1885.12	1892.41	1887.72	1845.76	1833.67	1823.17	1807.94	1780.88	1754.05	1717.58	1674.12	1655.57	1606.33	1606.33	1606.41	1606.43	1606.38	1606.33	1606.33	1606.33	1606.42	1606.35	1606.38	1606.3	1606.39	1606.38	1606.34	1606.37	1606.37	1606.4	1606.39	1606.39	1606.38	1606.38	1606.38	1606.41	1606.41	1606.34
	BEV-200 LT	2385.5	2480.96	2489.94	2483.25	2491.55	2460.33	2423.86	2407.01	2391.65	2378.3	2358.95	2324.57	2290.47	2244.12	2188.9	2165.32	2102.74	2102.74	2102.84	2102.87	2102.8	2102.75	2102.74	2102.75	2102.86	2102.77	2102.81	2102.71	2102.82	2102.81	2102.75	2102.79	2102.8	2102.83	2102.82	2102.82	2102.81	2102.81	2102.8	2102.84	2102.85
	HFCEV PC	1592.94	1617.22	1598.2	1603.02	1608.56	1605	1573.14	1563.97	1556	1544.44	1523.9	1503.54	1475.85	1442.87	1428.79	1391.41	1391.41	1391.47	1391.49	1391.45	1391.41	1391.41	1391.41	1391.48	1391.43	1391.45	1391.39	1391.46	1391.45	1391.42	1391.44	1391.45	1391.46	1391.46	1391.45	1391.45	1391.45	1391.45	1391.47	1391.47	1391.42
	HFCEV LT	1982.83	2055.29	2062.1	2057.03	2063.33	2039.63	2011.95	1999.16	1987.5	1977.37	1962.68	1936.58	1910.7	1875.52	1833.6	1815.71	1768.21	1768.2	1768.28	1768.3	1768.25	1768.21	1768.2	1768.21	1768.3	1768.23	1768.26	1768.18	1768.27	1768.26	1768.22	1768.24	1768.25	1768.27	1768.27	1768.26	1768.26	1768.26	1768.25	1768.28	1768.28
Battery capacity, kWh
	ICEV PC	0	0	0	0	0	0	0	0	0	0	0	0	0	0	0	0	0	0	0	0	0	0	0	0	0	0	0	0	0	0	0	0	0	0	0	0	0	0	0	0	0
	ICEV LT	0	0	0	0	0	0	0	0	0	0	0	0	0	0	0	0	0	0	0	0	0	0	0	0	0	0	0	0	0	0	0	0	0	0	0	0	0	0	0	0	0
	HEV PC	1.2319	1.25068	1.23597	1.2397	1.24397	1.24122	1.21659	1.2095	1.20333	1.19439	1.17851	1.16276	1.14135	1.11584	1.10495	1.07605	1.07604	1.07609	1.07611	1.07607	1.07605	1.07604	1.07605	1.0761	1.07606	1.07608	1.07603	1.07608	1.07608	1.07605	1.07607	1.07607	1.07609	1.07608	1.07608	1.07608	1.07608	1.07607	1.07609	1.07609	1.07605
	HEV LT	1.53342	1.58946	1.59473	1.5908	1.59567	1.57735	1.55594	1.54605	1.53703	1.52919	1.51783	1.49765	1.47764	1.45043	1.41801	1.40418	1.36744	1.36744	1.3675	1.36752	1.36748	1.36745	1.36744	1.36744	1.36751	1.36746	1.36748	1.36742	1.36749	1.36748	1.36745	1.36747	1.36748	1.36749	1.36749	1.36748	1.36748	1.36748	1.36748	1.3675	1.3675
	PHEV-10 PC	4.31125	4.37698	4.32549	4.33855	4.35352	4.34389	4.25769	4.23286	4.21128	4.17999	4.12442	4.0693	3.99437	3.9051	3.86699	3.76582	3.76582	3.76599	3.76603	3.76592	3.76584	3.76582	3.76583	3.76602	3.76588	3.76593	3.76577	3.76595	3.76594	3.76584	3.7659	3.76592	3.76597	3.76596	3.76594	3.76594	3.76594	3.76592	3.76599	3.76599	3.76584
	PHEV-10 LT	5.36649	5.5626	5.58104	5.56731	5.58436	5.52022	5.44529	5.41067	5.37912	5.3517	5.31194	5.24132	5.17127	5.07605	4.9626	4.91417	4.78561	4.78561	4.78582	4.78588	4.78574	4.78563	4.78561	4.78562	4.78586	4.78568	4.78576	4.78555	4.78578	4.78576	4.78564	4.78572	4.78574	4.7858	4.78578	4.78577	4.78576	4.78576	4.78574	4.78582	4.78583
	PHEV-40 PC	13.9855	14.1987	14.0317	14.074	14.1226	14.0913	13.8117	13.7312	13.6612	13.5597	13.3794	13.2006	12.9575	12.6679	12.5443	12.2161	12.2161	12.2167	12.2168	12.2165	12.2162	12.2161	12.2161	12.2168	12.2163	12.2165	12.216	12.2165	12.2165	12.2162	12.2164	12.2164	12.2166	12.2166	12.2165	12.2165	12.2165	12.2164	12.2167	12.2167	12.2162
	PHEV-40 LT	17.4086	18.0448	18.1046	18.06	18.1154	17.9073	17.6642	17.5519	17.4496	17.3606	17.2317	17.0025	16.7753	16.4664	16.0984	15.9413	15.5243	15.5243	15.525	15.5251	15.5247	15.5243	15.5243	15.5243	15.5251	15.5245	15.5247	15.5241	15.5248	15.5247	15.5244	15.5246	15.5247	15.5249	15.5248	15.5248	15.5247	15.5247	15.5247	15.525	15.525
	BEV-100 PC	31.822	32.3072	31.9272	32.0235	32.1341	32.063	31.4267	31.2434	31.0842	30.8532	30.443	30.0362	29.4831	28.8242	28.5429	27.7962	27.7961	27.7974	27.7977	27.7969	27.7963	27.7961	27.7962	27.7976	27.7966	27.797	27.7958	27.7971	27.797	27.7963	27.7968	27.7969	27.7972	27.7971	27.797	27.797	27.797	27.7969	27.7974	27.7974	27.7963
	BEV-100 LT	39.611	41.0585	41.1946	41.0932	41.2191	40.7457	40.1926	39.9371	39.7042	39.5018	39.2083	38.687	38.17	37.4672	36.6298	36.2723	35.3234	35.3234	35.325	35.3254	35.3244	35.3235	35.3234	35.3235	35.3252	35.3239	35.3245	35.3229	35.3246	35.3245	35.3236	35.3242	35.3243	35.3248	35.3247	35.3245	35.3245	35.3245	35.3243	35.325	35.325
	BEV-200 PC	62.5614	63.5153	62.7681	62.9576	63.1749	63.0351	61.7842	61.4239	61.1108	60.6567	59.8503	59.0505	57.9631	56.6677	56.1147	54.6467	54.6466	54.6491	54.6497	54.6481	54.6468	54.6466	54.6467	54.6495	54.6474	54.6483	54.6459	54.6485	54.6483	54.6469	54.6478	54.648	54.6487	54.6486	54.6484	54.6483	54.6483	54.6481	54.649	54.6491	54.6469
	BEV-200 LT	77.8743	80.7201	80.9877	80.7883	81.0358	80.1051	79.0178	78.5154	78.0575	77.6597	77.0827	76.0578	75.0414	73.6596	72.0134	71.3106	69.4451	69.445	69.4481	69.4489	69.4469	69.4453	69.445	69.4452	69.4487	69.446	69.4471	69.4441	69.4475	69.4472	69.4454	69.4465	69.4468	69.4477	69.4475	69.4473	69.4472	69.4472	69.4468	69.4481	69.4481
	HFCEV PC	1.73997	1.7665	1.74571	1.75098	1.75703	1.75314	1.71835	1.70833	1.69962	1.68699	1.66456	1.64232	1.61208	1.57605	1.56067	1.51984	1.51984	1.51991	1.51992	1.51988	1.51984	1.51984	1.51984	1.51992	1.51986	1.51988	1.51982	1.51989	1.51988	1.51985	1.51987	1.51988	1.5199	1.51989	1.51989	1.51989	1.51988	1.51988	1.51991	1.51991	1.51984
	HFCEV LT	2.16585	2.245	2.25244	2.24689	2.25378	2.22789	2.19765	2.18368	2.17095	2.15988	2.14383	2.11533	2.08706	2.04863	2.00284	1.9833	1.93141	1.93141	1.9315	1.93152	1.93147	1.93142	1.93141	1.93142	1.93151	1.93144	1.93147	1.93139	1.93148	1.93147	1.93142	1.93146	1.93146	1.93149	1.93148	1.93148	1.93147	1.93147	1.93146	1.9315	1.9315
DOD (depth of discharge)
	ICEV PC
	ICEV LT
	HEV PC
	HEV LT
	PHEV-10 PC	0.9	0.9	0.9	0.9	0.9	0.9	0.9	0.9	0.9	0.9	0.9	0.9	0.9	0.9	0.9	0.9	0.9	0.9	0.9	0.9	0.9	0.9	0.9	0.9	0.9	0.9	0.9	0.9	0.9	0.9	0.9	0.9	0.9	0.9	0.9	0.9	0.9	0.9	0.9	0.9	0.9
	PHEV-10 LT	0.9	0.9	0.9	0.9	0.9	0.9	0.9	0.9	0.9	0.9	0.9	0.9	0.9	0.9	0.9	0.9	0.9	0.9	0.9	0.9	0.9	0.9	0.9	0.9	0.9	0.9	0.9	0.9	0.9	0.9	0.9	0.9	0.9	0.9	0.9	0.9	0.9	0.9	0.9	0.9	0.9
	PHEV-40 PC	0.9	0.9	0.9	0.9	0.9	0.9	0.9	0.9	0.9	0.9	0.9	0.9	0.9	0.9	0.9	0.9	0.9	0.9	0.9	0.9	0.9	0.9	0.9	0.9	0.9	0.9	0.9	0.9	0.9	0.9	0.9	0.9	0.9	0.9	0.9	0.9	0.9	0.9	0.9	0.9	0.9
	PHEV-40 LT	0.9	0.9	0.9	0.9	0.9	0.9	0.9	0.9	0.9	0.9	0.9	0.9	0.9	0.9	0.9	0.9	0.9	0.9	0.9	0.9	0.9	0.9	0.9	0.9	0.9	0.9	0.9	0.9	0.9	0.9	0.9	0.9	0.9	0.9	0.9	0.9	0.9	0.9	0.9	0.9	0.9
	BEV-100 PC	0.9	0.9	0.9	0.9	0.9	0.9	0.9	0.9	0.9	0.9	0.9	0.9	0.9	0.9	0.9	0.9	0.9	0.9	0.9	0.9	0.9	0.9	0.9	0.9	0.9	0.9	0.9	0.9	0.9	0.9	0.9	0.9	0.9	0.9	0.9	0.9	0.9	0.9	0.9	0.9	0.9
	BEV-100 LT	0.9	0.9	0.9	0.9	0.9	0.9	0.9	0.9	0.9	0.9	0.9	0.9	0.9	0.9	0.9	0.9	0.9	0.9	0.9	0.9	0.9	0.9	0.9	0.9	0.9	0.9	0.9	0.9	0.9	0.9	0.9	0.9	0.9	0.9	0.9	0.9	0.9	0.9	0.9	0.9	0.9
	BEV-200 PC	0.9	0.9	0.9	0.9	0.9	0.9	0.9	0.9	0.9	0.9	0.9	0.9	0.9	0.9	0.9	0.9	0.9	0.9	0.9	0.9	0.9	0.9	0.9	0.9	0.9	0.9	0.9	0.9	0.9	0.9	0.9	0.9	0.9	0.9	0.9	0.9	0.9	0.9	0.9	0.9	0.9
	BEV-200 LT	0.9	0.9	0.9	0.9	0.9	0.9	0.9	0.9	0.9	0.9	0.9	0.9	0.9	0.9	0.9	0.9	0.9	0.9	0.9	0.9	0.9	0.9	0.9	0.9	0.9	0.9	0.9	0.9	0.9	0.9	0.9	0.9	0.9	0.9	0.9	0.9	0.9	0.9	0.9	0.9	0.9
	HFCEV PC
	HFCEV LT
Battery weight, kg
	ICEV PC	0	0	0	0	0	0	0	0	0	0	0	0	0	0	0	0	0	0	0	0	0	0	0	0	0	0	0	0	0	0	0	0	0	0	0	0	0	0	0	0	0
	ICEV LT	0	0	0	0	0	0	0	0	0	0	0	0	0	0	0	0	0	0	0	0	0	0	0	0	0	0	0	0	0	0	0	0	0	0	0	0	0	0	0	0	0
	HEV PC	10.2424	10.3986	10.2762	10.3073	10.3428	10.3199	10.1151	10.0562	10.0049	9.93057	9.79854	9.66759	9.48958	9.27749	9.18695	8.94661	8.9466	8.94701	8.94711	8.94685	8.94664	8.9466	8.94663	8.94708	8.94674	8.94688	8.9465	8.94692	8.94688	8.94666	8.94681	8.94684	8.94695	8.94693	8.9469	8.94689	8.94688	8.94684	8.947	8.94701	8.94665
	HEV LT	12.7494	13.2153	13.2591	13.2265	13.267	13.1146	12.9366	12.8543	12.7794	12.7142	12.6198	12.452	12.2856	12.0594	11.7898	11.6748	11.3694	11.3694	11.3699	11.37	11.3697	11.3694	11.3694	11.3694	11.37	11.3695	11.3697	11.3692	11.3698	11.3697	11.3694	11.3696	11.3697	11.3698	11.3698	11.3697	11.3697	11.3697	11.3697	11.3699	11.3699
	PHEV-10 PC	35.8452	36.3917	35.9636	36.0722	36.1967	36.1166	35.3998	35.1934	35.014	34.7539	34.2918	33.8335	33.2105	32.4683	32.1514	31.3103	31.3103	31.3117	31.3121	31.3112	31.3104	31.3103	31.3104	31.312	31.3108	31.3113	31.3099	31.3114	31.3113	31.3105	31.311	31.3111	31.3115	31.3114	31.3113	31.3113	31.3113	31.3111	31.3117	31.3117	31.3105
	PHEV-10 LT	44.6188	46.2494	46.4027	46.2885	46.4303	45.897	45.274	44.9862	44.7238	44.4959	44.1653	43.5781	42.9957	42.204	41.2608	40.8581	39.7892	39.7892	39.791	39.7914	39.7903	39.7894	39.7892	39.7893	39.7913	39.7898	39.7904	39.7887	39.7906	39.7904	39.7894	39.7901	39.7902	39.7907	39.7906	39.7905	39.7904	39.7904	39.7903	39.791	39.791
	PHEV-40 PC	116.28	118.053	116.664	117.016	117.42	117.16	114.835	114.166	113.584	112.74	111.241	109.754	107.733	105.325	104.298	101.569	101.569	101.574	101.575	101.572	101.569	101.569	101.569	101.574	101.571	101.572	101.568	101.573	101.572	101.57	101.571	101.572	101.573	101.573	101.572	101.572	101.572	101.572	101.573	101.574	101.569
	PHEV-40 LT	144.741	150.03	150.528	150.157	150.617	148.887	146.866	145.933	145.082	144.342	143.27	141.365	139.476	136.908	133.848	132.542	129.074	129.074	129.08	129.081	129.078	129.075	129.074	129.074	129.081	129.076	129.078	129.072	129.079	129.078	129.075	129.077	129.077	129.079	129.079	129.078	129.078	129.078	129.077	129.08	129.08
	BEV-100 PC	264.579	268.613	265.453	266.255	267.174	266.582	261.292	259.768	258.444	256.524	253.114	249.731	245.132	239.654	237.315	231.107	231.107	231.117	231.12	231.113	231.108	231.107	231.107	231.119	231.11	231.114	231.104	231.115	231.114	231.108	231.112	231.113	231.116	231.115	231.114	231.114	231.114	231.113	231.117	231.117	231.108
	BEV-100 LT	329.339	341.374	342.506	341.663	342.71	338.773	334.175	332.051	330.114	328.431	325.991	321.657	317.359	311.515	304.553	301.581	293.691	293.691	293.704	293.707	293.699	293.692	293.691	293.691	293.706	293.695	293.7	293.687	293.701	293.7	293.692	293.697	293.698	293.702	293.701	293.7	293.7	293.7	293.698	293.704	293.704
	BEV-200 PC	520.157	528.088	521.876	523.451	525.257	524.095	513.695	510.699	508.096	504.321	497.616	490.966	481.925	471.154	466.556	454.351	454.35	454.371	454.376	454.363	454.353	454.35	454.352	454.375	454.357	454.364	454.345	454.367	454.365	454.353	454.361	454.362	454.368	454.367	454.365	454.365	454.365	454.363	454.371	454.371	454.353
	BEV-200 LT	647.473	671.134	673.359	671.702	673.759	666.021	656.981	652.804	648.997	645.689	640.892	632.371	623.92	612.431	598.744	592.901	577.39	577.389	577.415	577.422	577.405	577.392	577.389	577.391	577.42	577.398	577.407	577.382	577.41	577.407	577.393	577.402	577.405	577.412	577.41	577.408	577.408	577.407	577.405	577.415	577.416
	HFCEV PC	14.4667	14.6873	14.5145	14.5583	14.6085	14.5762	14.2869	14.2036	14.1312	14.0262	13.8397	13.6548	13.4034	13.1038	12.9759	12.6365	12.6364	12.637	12.6372	12.6368	12.6365	12.6364	12.6365	12.6371	12.6366	12.6368	12.6363	12.6369	12.6368	12.6365	12.6367	12.6368	12.6369	12.6369	12.6369	12.6368	12.6368	12.6368	12.637	12.637	12.6365
	HFCEV LT	18.0076	18.6657	18.7275	18.6814	18.7387	18.5235	18.272	18.1559	18.05	17.958	17.8246	17.5876	17.3525	17.033	16.6523	16.4898	16.0584	16.0584	16.0591	16.0593	16.0589	16.0585	16.0584	16.0585	16.0593	16.0587	16.0589	16.0582	16.059	16.0589	16.0585	16.0588	16.0588	16.059	16.059	16.0589	16.0589	16.0589	16.0588	16.0591	16.0591
Weight credit, kg
	ICEV PC	0	0	0	0	0	0	0	0	0	0	0	0	0	0	0	0	0	0	0	0	0	0	0	0	0	0	0	0	0	0	0	0	0	0	0	0	0	0	0	0	0
	ICEV LT	0	0	0	0	0	0	0	0	0	0	0	0	0	0	0	0	0	0	0	0	0	0	0	0	0	0	0	0	0	0	0	0	0	0	0	0	0	0	0	0	0
	HEV PC	0	0	0	0	0	0	0	0	0	0	0	0	0	0	0	0	0	0	0	0	0	0	0	0	0	0	0	0	0	0	0	0	0	0	0	0	0	0	0	0	0
	HEV LT	0	0	0	0	0	0	0	0	0	0	0	0	0	0	0	0	0	0	0	0	0	0	0	0	0	0	0	0	0	0	0	0	0	0	0	0	0	0	0	0	0
	PHEV-10 PC	0	0	0	0	0	0	0	0	0	0	0	0	0	0	0	0	0	0	0	0	0	0	0	0	0	0	0	0	0	0	0	0	0	0	0	0	0	0	0	0	0
	PHEV-10 LT	0	0	0	0	0	0	0	0	0	0	0	0	0	0	0	0	0	0	0	0	0	0	0	0	0	0	0	0	0	0	0	0	0	0	0	0	0	0	0	0	0
	PHEV-40 PC	0	0	0	0	0	0	0	0	0	0	0	0	0	0	0	0	0	0	0	0	0	0	0	0	0	0	0	0	0	0	0	0	0	0	0	0	0	0	0	0	0
	PHEV-40 LT	0	0	0	0	0	0	0	0	0	0	0	0	0	0	0	0	0	0	0	0	0	0	0	0	0	0	0	0	0	0	0	0	0	0	0	0	0	0	0	0	0
	BEV-100 PC	226.796	226.796	226.796	226.796	226.796	226.796	226.796	226.796	226.796	226.796	226.796	226.796	226.796	226.796	226.796	226.796	226.796	226.796	226.796	226.796	226.796	226.796	226.796	226.796	226.796	226.796	226.796	226.796	226.796	226.796	226.796	226.796	226.796	226.796	226.796	226.796	226.796	226.796	226.796	226.796	226.796
	BEV-100 LT	226.796	226.796	226.796	226.796	226.796	226.796	226.796	226.796	226.796	226.796	226.796	226.796	226.796	226.796	226.796	226.796	226.796	226.796	226.796	226.796	226.796	226.796	226.796	226.796	226.796	226.796	226.796	226.796	226.796	226.796	226.796	226.796	226.796	226.796	226.796	226.796	226.796	226.796	226.796	226.796	226.796
	BEV-200 PC	226.796	226.796	226.796	226.796	226.796	226.796	226.796	226.796	226.796	226.796	226.796	226.796	226.796	226.796	226.796	226.796	226.796	226.796	226.796	226.796	226.796	226.796	226.796	226.796	226.796	226.796	226.796	226.796	226.796	226.796	226.796	226.796	226.796	226.796	226.796	226.796	226.796	226.796	226.796	226.796	226.796
	BEV-200 LT	226.796	226.796	226.796	226.796	226.796	226.796	226.796	226.796	226.796	226.796	226.796	226.796	226.796	226.796	226.796	226.796	226.796	226.796	226.796	226.796	226.796	226.796	226.796	226.796	226.796	226.796	226.796	226.796	226.796	226.796	226.796	226.796	226.796	226.796	226.796	226.796	226.796	226.796	226.796	226.796	226.796
	HFCEV PC	0	0	0	0	0	0	0	0	0	0	0	0	0	0	0	0	0	0	0	0	0	0	0	0	0	0	0	0	0	0	0	0	0	0	0	0	0	0	0	0	0
	HFCEV LT	0	0	0	0	0	0	0	0	0	0	0	0	0	0	0	0	0	0	0	0	0	0	0	0	0	0	0	0	0	0	0	0	0	0	0	0	0	0	0	0	0
Fuel consumption, kWh/100km
	ICEV PC	77.3577	78.1834	72.7931	71.6068	71.0725	69.6279	69.753	67.2772	66.3067	63.2971	61.4236	60.0593	57.6697	54.3152	54.0387	51.1212	51.1445	51.1498	51.2814	51.3897	51.4101	51.5254	51.6236	51.7397	51.854	51.9787	52.0821	52.2249	52.3812	52.5157	52.6607	52.5378	52.6529	52.7643	52.8765	52.9869	53.092	53.1885	53.2907	53.3907	53.4589
	ICEV LT	108.001	107.157	105.673	103.389	98.7268	98.9416	95.9134	93.9466	92.229	89.8315	86.0032	81.8703	78.7544	75.7306	71.8584	69.8141	69.5693	69.3339	69.2327	69.0548	68.7976	68.6686	68.5183	68.3973	68.3376	68.2626	68.1946	68.1766	68.2434	68.25	68.2742	68.2557	68.262	68.2626	68.298	68.3167	68.3298	68.3536	68.3879	68.417	68.3886
	HEV PC	53.3501	53.9196	50.2021	49.384	49.0155	48.0192	48.1055	46.3981	45.7287	43.6532	42.3611	41.4202	39.7722	37.4588	37.268	35.256	35.2721	35.2758	35.3665	35.4412	35.4552	35.5347	35.6025	35.6826	35.7614	35.8474	35.9187	36.0172	36.125	36.2177	36.3177	36.233	36.3123	36.3892	36.4666	36.5427	36.6152	36.6818	36.7522	36.8212	36.8682
	HEV LT	74.4833	73.9015	72.8781	71.3031	68.0875	68.2356	66.1472	64.7907	63.6062	61.9528	59.3126	56.4623	54.3134	52.228	49.5575	48.1476	47.9788	47.8165	47.7467	47.624	47.4467	47.3577	47.254	47.1706	47.1294	47.0777	47.0307	47.0183	47.0644	47.0689	47.0857	47.0729	47.0773	47.0777	47.1021	47.1149	47.124	47.1404	47.1641	47.1841	47.1646
	PHEV-10 PC	53.3501	53.9196	50.2021	49.384	49.0155	48.0192	48.1055	46.3981	45.7287	43.6532	42.3611	41.4202	39.7722	37.4588	37.268	35.256	35.2721	35.2758	35.3665	35.4412	35.4552	35.5347	35.6025	35.6826	35.7614	35.8474	35.9187	36.0172	36.125	36.2177	36.3177	36.233	36.3123	36.3892	36.4666	36.5427	36.6152	36.6818	36.7522	36.8212	36.8682
	PHEV-10 LT	74.4833	73.9015	72.8781	71.3031	68.0875	68.2356	66.1472	64.7907	63.6062	61.9528	59.3126	56.4623	54.3134	52.228	49.5575	48.1476	47.9788	47.8165	47.7467	47.624	47.4467	47.3577	47.254	47.1706	47.1294	47.0777	47.0307	47.0183	47.0644	47.0689	47.0857	47.0729	47.0773	47.0777	47.1021	47.1149	47.124	47.1404	47.1641	47.1841	47.1646
	PHEV-40 PC	53.3501	53.9196	50.2021	49.384	49.0155	48.0192	48.1055	46.3981	45.7287	43.6532	42.3611	41.4202	39.7722	37.4588	37.268	35.256	35.2721	35.2758	35.3665	35.4412	35.4552	35.5347	35.6025	35.6826	35.7614	35.8474	35.9187	36.0172	36.125	36.2177	36.3177	36.233	36.3123	36.3892	36.4666	36.5427	36.6152	36.6818	36.7522	36.8212	36.8682
	PHEV-40 LT	74.4833	73.9015	72.8781	71.3031	68.0875	68.2356	66.1472	64.7907	63.6062	61.9528	59.3126	56.4623	54.3134	52.228	49.5575	48.1476	47.9788	47.8165	47.7467	47.624	47.4467	47.3577	47.254	47.1706	47.1294	47.0777	47.0307	47.0183	47.0644	47.0689	47.0857	47.0729	47.0773	47.0777	47.1021	47.1149	47.124	47.1404	47.1641	47.1841	47.1646
	BEV-100 PC	0	0	0	0	0	0	0	0	0	0	0	0	0	0	0	0	0	0	0	0	0	0	0	0	0	0	0	0	0	0	0	0	0	0	0	0	0	0	0	0	0
	BEV-100 LT	0	0	0	0	0	0	0	0	0	0	0	0	0	0	0	0	0	0	0	0	0	0	0	0	0	0	0	0	0	0	0	0	0	0	0	0	0	0	0	0	0
	BEV-200 PC	0	0	0	0	0	0	0	0	0	0	0	0	0	0	0	0	0	0	0	0	0	0	0	0	0	0	0	0	0	0	0	0	0	0	0	0	0	0	0	0	0
	BEV-200 LT	0	0	0	0	0	0	0	0	0	0	0	0	0	0	0	0	0	0	0	0	0	0	0	0	0	0	0	0	0	0	0	0	0	0	0	0	0	0	0	0	0
	HFCEV PC	41.5277	42.1609	41.665	41.7907	41.9349	41.2742	40.1967	39.6375	39.2457	38.4077	37.4102	36.4378	35.012	33.2437	32.9172	31.1953	31.1948	31.1972	31.1978	31.1963	31.1932	31.1956	31.1958	31.1984	31.1964	31.1972	31.195	31.1975	31.1973	31.196	31.1968	31.197	31.1977	31.1976	31.1974	31.1973	31.1973	31.1971	31.198	31.198	31.1959
	HFCEV LT	51.6923	53.5813	53.7589	53.6266	53.7909	52.4513	51.4089	50.6669	50.129	49.1739	48.1816	46.9324	45.328	43.2119	42.2435	40.708	39.6425	39.6437	39.6458	39.6454	39.6413	39.6436	39.6435	39.6449	39.646	39.6449	39.6444	39.644	39.6458	39.6449	39.6444	39.6451	39.6456	39.646	39.6458	39.6457	39.6456	39.6455	39.6457	39.6465	39.6455
Electricity consumption, kWh/100km
	ICEV PC	0	0	0	0	0	0	0	0	0	0	0	0	0	0	0	0	0	0	0	0	0	0	0	0	0	0	0	0	0	0	0	0	0	0	0	0	0	0	0	0	0
	ICEV LT	0	0	0	0	0	0	0	0	0	0	0	0	0	0	0	0	0	0	0	0	0	0	0	0	0	0	0	0	0	0	0	0	0	0	0	0	0	0	0	0	0
	HEV PC	0	0	0	0	0	0	0	0	0	0	0	0	0	0	0	0	0	0	0	0	0	0	0	0	0	0	0	0	0	0	0	0	0	0	0	0	0	0	0	0	0
	HEV LT	0	0	0	0	0	0	0	0	0	0	0	0	0	0	0	0	0	0	0	0	0	0	0	0	0	0	0	0	0	0	0	0	0	0	0	0	0	0	0	0	0
	PHEV-10 PC	24.1634	24.5318	24.2432	24.3164	24.4003	24.3463	23.8632	23.724	23.6031	23.4277	23.1162	22.8073	22.3874	21.887	21.6734	21.1064	21.1064	21.1074	21.1076	21.107	21.1065	21.1064	21.1065	21.1075	21.1067	21.107	21.1061	21.1072	21.1071	21.1065	21.1069	21.107	21.1072	21.1072	21.1071	21.1071	21.1071	21.107	21.1073	21.1074	21.1065
	PHEV-10 LT	30.0777	31.1769	31.2802	31.2033	31.2988	30.9394	30.5194	30.3254	30.1485	29.9948	29.772	29.3762	28.9836	28.4499	27.8141	27.5426	26.8221	26.8221	26.8233	26.8236	26.8228	26.8222	26.8221	26.8221	26.8235	26.8225	26.8229	26.8217	26.823	26.8229	26.8222	26.8227	26.8228	26.8231	26.823	26.8229	26.8229	26.8229	26.8228	26.8233	26.8233
	PHEV-40 PC	19.5962	19.895	19.6609	19.7203	19.7883	19.7445	19.3527	19.2399	19.1418	18.9996	18.747	18.4964	18.1558	17.7501	17.5769	17.117	17.117	17.1178	17.118	17.1175	17.1171	17.117	17.1171	17.1179	17.1173	17.1175	17.1168	17.1176	17.1175	17.1171	17.1174	17.1175	17.1177	17.1176	17.1176	17.1175	17.1175	17.1175	17.1178	17.1178	17.1171
	PHEV-40 LT	24.3926	25.284	25.3679	25.3054	25.3829	25.0914	24.7508	24.5935	24.45	24.3254	24.1447	23.8237	23.5053	23.0725	22.5568	22.3367	21.7523	21.7523	21.7533	21.7536	21.7529	21.7524	21.7523	21.7524	21.7535	21.7527	21.753	21.7521	21.7531	21.753	21.7525	21.7528	21.7529	21.7532	21.7531	21.753	21.753	21.753	21.7529	21.7533	21.7533
	BEV-100 PC	17.8354	18.1073	17.8943	17.9483	18.0103	17.9704	17.6138	17.5111	17.4218	17.2924	17.0625	16.8345	16.5245	16.1552	15.9975	15.579	15.579	15.5797	15.5799	15.5794	15.5791	15.579	15.579	15.5798	15.5792	15.5795	15.5788	15.5795	15.5795	15.5791	15.5793	15.5794	15.5796	15.5796	15.5795	15.5795	15.5795	15.5794	15.5797	15.5797	15.5791
	BEV-100 LT	22.2009	23.0122	23.0885	23.0316	23.1022	22.8368	22.5269	22.3837	22.2531	22.1397	21.9752	21.683	21.3933	20.9993	20.53	20.3297	19.7978	19.7978	19.7987	19.7989	19.7983	19.7979	19.7978	19.7979	19.7989	19.7981	19.7984	19.7976	19.7985	19.7984	19.7979	19.7982	19.7983	19.7986	19.7985	19.7985	19.7984	19.7984	19.7983	19.7987	19.7987
	BEV-200 PC	17.532	17.7993	17.5899	17.643	17.7039	17.6647	17.3142	17.2132	17.1255	16.9982	16.7722	16.5481	16.2434	15.8804	15.7254	15.314	15.314	15.3147	15.3148	15.3144	15.314	15.314	15.314	15.3148	15.3142	15.3144	15.3138	15.3145	15.3145	15.3141	15.3143	15.3144	15.3146	15.3145	15.3145	15.3145	15.3145	15.3144	15.3147	15.3147	15.314
	BEV-200 LT	21.8232	22.6207	22.6957	22.6398	22.7092	22.4484	22.1437	22.0029	21.8746	21.7631	21.6014	21.3142	21.0294	20.6421	20.1808	19.9838	19.461	19.461	19.4619	19.4621	19.4616	19.4611	19.461	19.4611	19.4621	19.4613	19.4616	19.4608	19.4617	19.4616	19.4611	19.4615	19.4615	19.4618	19.4617	19.4617	19.4616	19.4616	19.4615	19.4619	19.4619
	HFCEV PC	0	0	0	0	0	0	0	0	0	0	0	0	0	0	0	0	0	0	0	0	0	0	0	0	0	0	0	0	0	0	0	0	0	0	0	0	0	0	0	0	0
	HFCEV LT	0	0	0	0	0	0	0	0	0	0	0	0	0	0	0	0	0	0	0	0	0	0	0	0	0	0	0	0	0	0	0	0	0	0	0	0	0	0	0	0	0
Annual survival-weighted vehicle kilometers travelled (VKT)
	Vintage	1	2	3	4	5	6	7	8	9	10	11	12	13	14	15	16	17	18	19	20	21	22	23	24	25+	Sum
	PC	22292.7	21629.1	20987.5	20367.7	19530.9	18257.3	16961.6	15668	14397.3	13151.2	11946.7	10782.9	9673.68	8616.26	7635.82	6713.36	5871.23	5103.27	4403.71	3767.1	3211.98	2708.89	2276.08	1886.12	1513.89	269354
	LT	24623.4	23815.2	22803.6	21456.5	20090.9	18672.5	17251.7	15833.9	14442.1	13078.6	11762.1	10508.8	9299.97	8181.07	7146.14	6189.4	5319.38	4529.39	3826.35	3203.18	2665.74	2194.84	1796.76	1615.65	1476.24	271783

## Sheet: 2 ass en
Vehicle assembly
			Electricity	Fossil fuel mix	Hydrogen	Gasoline	Diesel	Natural gas	Unit
Vehicle assembly energy factors, kWh/kg vehicle
ICEV	PC	1.51214	0.768813	0.743331	0	0	0	0	kWh/kg vehicle		For more information on theis data has been derived please see:
	LT	1.51214	0.768813	0.743331	0	0	0	0	kWh/kg vehicle		https://doi.org/10.1111/jiec.13067
HEV	PC	1.54873	0.787413	0.761314	0	0	0	0	kWh/kg vehicle
	LT	1.54873	0.787413	0.761314	0	0	0	0	kWh/kg vehicle
PHEV-10	PC	1.63814	0.832875	0.805269	0	0	0	0	kWh/kg vehicle
	LT	1.63814	0.832875	0.805269	0	0	0	0	kWh/kg vehicle
PHEV-40	PC	1.90148	0.966764	0.93472	0	0	0	0	kWh/kg vehicle
	LT	1.90148	0.966764	0.93472	0	0	0	0	kWh/kg vehicle
BEV-100	PC	2.43986	1.24011	1.19975	0	0	0	0	kWh/kg vehicle
	LT	2.41248	1.22665	1.18583	0	0	0	0	kWh/kg vehicle
BEV-300	PC	3.08726	1.56908	1.51817	0	0	0	0	kWh/kg vehicle
	LT	3.04695	1.54927	1.49769	0	0	0	0	kWh/kg vehicle
HFCEV	PC	1.56368	0.795015	0.768664	0	0	0	0	kWh/kg vehicle
	LT	1.56368	0.795015	0.768664	0	0	0	0	kWh/kg vehicle
Vehicle without battery, kwh/kg vehicle
ICEV	PC	1.51214	0.768813	0.743331
	LT	1.51214	0.768813	0.743331
HEV	PC	1.51214	0.768813	0.743331
	LT	1.51214	0.768813	0.743331
PHEV-10	PC	1.51214	0.768813	0.743331
	LT	1.51214	0.768813	0.743331
PHEV-40	PC	1.51214	0.768813	0.743331
	LT	1.51214	0.768813	0.743331
BEV-100	PC	1.51214	0.768813	0.743331
	LT	1.51214	0.768813	0.743331
BEV-300	PC	1.51214	0.768813	0.743331
	LT	1.51214	0.768813	0.743331
HFCEV	PC	1.51214	0.768813	0.743331
	LT	1.51214	0.768813	0.743331
Battery assembly energy, kWh
		2010
ICEV	PC	0
	LT	0
HEV	PC	58.1208
	LT	72.3468
PHEV-10	PC	203.405
	LT	253.191
PHEV-40	PC	659.834
	LT	821.338
BEV-100	PC	1501.36
	LT	1868.84
BEV-300	PC	2951.65
	LT	3674.11
HFCEV	PC	82.0916
	LT	102.185
Battery weight, kg		2010
ICEV	PC	0
	LT	0
HEV	PC	10.2424
	LT	12.7494
PHEV-10	PC	35.8452
	LT	44.6188
PHEV-40	PC	116.28
	LT	144.741
BEV-100	PC	264.579
	LT	329.339
BEV-300	PC	520.157
	LT	647.473
HFCEV	PC	14.4667
	LT	18.0076
Battery assembly energy use, kwh/kg
ICEV	PC	0
	LT	0
HEV	PC	5.67453
	LT	5.67453
PHEV-10	PC	5.67453
	LT	5.67453
PHEV-40	PC	5.67453
	LT	5.67453
BEV-100	PC	5.67453
	LT	5.67453
BEV-300	PC	5.67453
	LT	5.67453
HFCEV	PC	5.67453
	LT	5.67453
Share of battery weight as a fraction of total weight
ICEV	PC	0	0	0
	LT	0	0	0
HEV	PC	0.00644699	0.00644699	0.00644699
	LT	0.00644699	0.00644699	0.00644699
PHEV-10	PC	0.0222046	0.0222046	0.0222046
	LT	0.0222046	0.0222046	0.0222046
PHEV-40	PC	0.0686119	0.0686119	0.0686119
	LT	0.0686119	0.0686119	0.0686119
BEV-100	PC	0.163699	0.163355	0.163624
	LT	0.159304	0.15869	0.158635
BEV-300	PC	0.277887	0.277382	0.277776
	LT	0.27142	0.270514	0.270432
HFCEV	PC	0.00908177	0.00908177	0.00908177
	LT	0.00908177	0.00908177	0.00908177
Weighted battery energy use kwh battery energy use/kg vehicle weight
ICEV	PC	0	0	0
	LT	0	0	0
HEV	PC	0.0365836	0	0
	LT	0.0365836	0	0
PHEV-10	PC	0.126001	0	0
	LT	0.126001	0	0
PHEV-40	PC	0.38934	0	0
	LT	0.38934	0	0
BEV-100	PC	0.928917	0	0
	LT	0.903974	0	0
BEV-300	PC	1.57688	0	0
	LT	1.54018	0	0
HFCEV	PC	0.0515348	0	0
	LT	0.0515348	0	0

## Sheet: 3 mat com
Material composition as a linear function of degree of lightweighting
			variable	fixed
ICEV	PC	automotive steel	-1.6247	0.622
		stainless steel	0.0559	0
		cast iron	-0.3408	0.1017
		wrought Al	1.1092	0.0187
		cast Al	0.6556	0.0441
		copper electric grade	0.0589	0.0186
		plastics	0.105	0.1128
		other	-0.0191	0.0822
	LT	automotive steel	-1.6247	0.622
		stainless steel	0.0559	0
		cast iron	-0.3408	0.1017
		wrought Al	1.1092	0.0187
		cast Al	0.6556	0.0441
		copper electric grade	0.0589	0.0186
		plastics	0.105	0.1128
		other	-0.0191	0.0822
HEV	PC	automotive steel	-1.3703	0.6371
		stainless steel	0.0378	0
		cast iron	-0.1562	0.0723
		wrought Al	0.9141	0.0127
		cast Al	0.4941	0.0571
		copper electric grade	0.0286	0.0395
		plastics	0.0651	0.1069
		other	-0.0133	0.0744
	LT	automotive steel	-1.3703	0.6371
		stainless steel	0.0378	0
		cast iron	-0.1562	0.0723
		wrought Al	0.9141	0.0127
		cast Al	0.4941	0.0571
		copper electric grade	0.0286	0.0395
		plastics	0.0651	0.1069
		other	-0.0133	0.0744
PHEV-10	PC	automotive steel	-1.2278	0.59
		stainless steel	0.0323	0
		cast iron	-0.144	0.0655
		wrought Al	0.7575	0.0298
		cast Al	0.4423	0.0614
		copper electric grade	0.0038	0.0543
		plastics	0.3753	0.0227
		other	-0.2395	0.1763
	LT	automotive steel	-1.2278	0.59
		stainless steel	0.0323	0
		cast iron	-0.144	0.0655
		wrought Al	0.7575	0.0298
		cast Al	0.4423	0.0614
		copper electric grade	0.0038	0.0543
		plastics	0.3753	0.0227
		other	-0.2395	0.1763
PHEV-40	PC	automotive steel	-1.2278	0.59
		stainless steel	0.0323	0
		cast iron	-0.144	0.0655
		wrought Al	0.7575	0.0298
		cast Al	0.4423	0.0614
		copper electric grade	0.0038	0.0543
		plastics	0.3753	0.0227
		other	-0.2395	0.1763
	LT	automotive steel	-1.2278	0.59
		stainless steel	0.0323	0
		cast iron	-0.144	0.0655
		wrought Al	0.7575	0.0298
		cast Al	0.4423	0.0614
		copper electric grade	0.0038	0.0543
		plastics	0.3753	0.0227
		other	-0.2395	0.1763
BEV-100	PC	automotive steel	-1.0606	0.568
		stainless steel	0.0303	0
		cast iron	0.0644	0.0172
		wrought Al	0.6756	0.0382
		cast Al	0.4668	0.0488
		copper electric grade	-0.04	0.0649
		plastics	0.032	0.1002
		other	-0.1685	0.1627
	LT	automotive steel	-1.0606	0.568
		stainless steel	0.0303	0
		cast iron	0.0644	0.0172
		wrought Al	0.6756	0.0382
		cast Al	0.4668	0.0488
		copper electric grade	-0.04	0.0649
		plastics	0.032	0.1002
		other	-0.1685	0.1627
BEV-200	PC	automotive steel	-1.0606	0.568
		stainless steel	0.0303	0
		cast iron	0.0644	0.0172
		wrought Al	0.6756	0.0382
		cast Al	0.4668	0.0488
		copper electric grade	-0.04	0.0649
		plastics	0.032	0.1002
		other	-0.1685	0.1627
	LT	automotive steel	-1.0606	0.568
		stainless steel	0.0303	0
		cast iron	0.0644	0.0172
		wrought Al	0.6756	0.0382
		cast Al	0.4668	0.0488
		copper electric grade	-0.04	0.0649
		plastics	0.032	0.1002
		other	-0.1685	0.1627
HFCEV	PC	automotive steel	-1.2513	0.5666
		stainless steel	-0.104	0.0312
		cast iron	0.0235	0.0199
		wrought Al	0.7648	0.0218
		cast Al	0.4596	0.0331
		copper electric grade	0.1506	0.0329
		plastics	0.0417	0.1197
		other	-0.0846	0.1748
	LT	automotive steel	-1.2513	0.5666
		stainless steel	-0.104	0.0312
		cast iron	0.0235	0.0199
		wrought Al	0.7648	0.0218
		cast Al	0.4596	0.0331
		copper electric grade	0.1506	0.0329
		plastics	0.0417	0.1197
		other	-0.0846	0.1748

## Sheet: 4 mat co2
Material emission factors as a linear function of electricity decarbonization, kg CO2/kg
	variable	fixed
production of automotive steel, primary	0.0006	2.0035
production of stainless steel, primary	0.0021	3.0928
production of cast iron, primary	0.0002	1.7188
production of wrought Al, primary	0.0103	4.1826
production of cast Al, primary	0.0103	4.1826
production of copper electric grade, primary	0.0037	2.4457
production of plastics, primary	2e-05	2.1124
placeholder for other	0	2

## Sheet: 5 en co2
Energy carrier emission factors, g CO2e/kWh
	2010	2011	2012	2013	2014	2015	2016	2017	2018	2019	2020	2021	2022	2023	2024	2025	2026	2027	2028	2029	2030	2031	2032	2033	2034	2035	2036	2037	2038	2039	2040	2041	2042	2043	2044	2045	2046	2047	2048	2049	2050
Electricity mix	549.723	529.441	502.005	503.47	499.009	467.97	435.094	433.961	426.743	415.236	392.025	355.479	317.46	272.465	252.538	238.809	230.916	220.394	213.378	200.835	180.693	162.425	149.156	131.646	118.567	108.839	104.111	97.677	92.5347	87.5248	82.3284	78.525	74.0678	71.6292	69.2141	66.0045	61.7011	57.8166	53.6855	50.4317	45.4093
Heat, natural gas	218	218	218	218	218	218	218	218	218	218	218	218	218	218	218	218	218	218	218	218	218	218	218	218	218	218	218	218	218	218	218	218	218	218	218	218	218	218	218	218	218
Heat, coal	659	659	659	659	659	659	659	659	659	659	659	659	659	659	659	659	659	659	659	659	659	659	659	659	659	659	659	659	659	659	659	659	659	659	659	659	659	659	659	659	659
Vehicle assembly mix	400.409	390.065	376.072	376.82	374.545	358.715	341.948	341.37	337.689	331.821	319.983	301.344	281.954	259.007	248.844	241.843	237.817	232.451	228.873	222.476	212.203	202.887	196.12	187.189	180.519	175.558	173.147	169.865	167.243	164.688	162.037	160.098	157.825	156.581	155.349	153.712	151.518	149.536	147.43	145.77	143.209
Gasoline (E-15 blend) combustion	254	254	254	254	254	254	254	254	254	254	254	254	254	254	254	254	254	254	254	254	254	254	254	254	254	254	254	254	254	254	254	254	254	254	254	254	254	254	254	254	254
Gasoline (E-15 blend) upstream	70	70	70	70	70	70	70	70	70	70	70	70	70	70	70	70	70	70	70	70	70	70	70	70	70	70	70	70	70	70	70	70	70	70	70	70	70	70	70	70	70
Hydrogen	460	460	460	460	460	460	460	460	460	460	460	460	460	460	460	460	460	460	460	460	460	460	460	460	460	460	460	460	460	460	460	460	460	460	460	460	460	460	460	460	460
Hydrogen (low-carbon)	460	460	460	460	460	460	460	460	460	460	460	450	435	420	405	390	375	360	345	330	315	300	285	270	255	240	225	210	195	180	165	150	135	120	105	90	75	60	45	30	0
For more information on theis data has been derived please see:
https://doi.org/10.1111/jiec.13067

## Sheet: 6 reu en
Reuse energy factors, kWh/kg vehicle
	Electricity	Fossil fuel mix	Hydrogen	Gasoline	Diesel	Natural gas	Unit
ICEV	0.461288	0.445998	0	0	0	0	kWh/kg vehicle
HEV	0.472448	0.456789	0	0	0	0	kWh/kg vehicle
PHEV	0.499725	0.483162	0	0	0	0	kWh/kg vehicle
BEV	0.744063	0.719851	0	0	0	0	kWh/kg vehicle
HFCEV	0.477009	0.461198	0	0	0	0	kWh/kg vehicle
For more information on theis data has been derived please see:
https://doi.org/10.1111/jiec.13067

## Sheet: 7 rec
Recycled content
	2010	2011	2012	2013	2014	2015	2016	2017	2018	2019	2020	2021	2022	2023	2024	2025	2026	2027	2028	2029	2030	2031	2032	2033	2034	2035	2036	2037	2038	2039	2040	2041	2042	2043	2044	2045	2046	2047	2048	2049	2050
Increasing rates
automotive steel	0.264	0.264	0.264	0.264	0.264	0.264	0.264	0.264	0.264	0.264	0.264	0.2876	0.3112	0.3348	0.3584	0.382	0.4056	0.4292	0.4528	0.4764	0.5	0.5	0.5	0.5	0.5	0.5	0.5	0.5	0.5	0.5	0.5	0.5	0.5	0.5	0.5	0.5	0.5	0.5	0.5	0.5	0.5
stainless steel	0.41	0.41	0.41	0.41	0.41	0.41	0.41	0.41	0.41	0.41	0.41	0.419	0.428	0.437	0.446	0.455	0.464	0.473	0.482	0.491	0.5	0.5	0.5	0.5	0.5	0.5	0.5	0.5	0.5	0.5	0.5	0.5	0.5	0.5	0.5	0.5	0.5	0.5	0.5	0.5	0.5
cast iron	0.3	0.3	0.3	0.3	0.3	0.3	0.3	0.3	0.3	0.3	0.3	0.32	0.34	0.36	0.38	0.4	0.42	0.44	0.46	0.48	0.5	0.5	0.5	0.5	0.5	0.5	0.5	0.5	0.5	0.5	0.5	0.5	0.5	0.5	0.5	0.5	0.5	0.5	0.5	0.5	0.5
wrought Al	0.11	0.11	0.11	0.11	0.11	0.11	0.11	0.11	0.11	0.11	0.11	0.149	0.188	0.227	0.266	0.305	0.344	0.383	0.422	0.461	0.5	0.5	0.5	0.5	0.5	0.5	0.5	0.5	0.5	0.5	0.5	0.5	0.5	0.5	0.5	0.5	0.5	0.5	0.5	0.5	0.5
cast Al	0.85	0.85	0.85	0.85	0.85	0.85	0.85	0.85	0.85	0.85	0.85	0.85	0.85	0.85	0.85	0.85	0.85	0.85	0.85	0.85	0.85	0.85	0.85	0.85	0.85	0.85	0.85	0.85	0.85	0.85	0.85	0.85	0.85	0.85	0.85	0.85	0.85	0.85	0.85	0.85	0.85
copper electric grade	0.2	0.2	0.2	0.2	0.2	0.2	0.2	0.2	0.2	0.2	0.2	0.23	0.26	0.29	0.32	0.35	0.38	0.41	0.44	0.47	0.5	0.5	0.5	0.5	0.5	0.5	0.5	0.5	0.5	0.5	0.5	0.5	0.5	0.5	0.5	0.5	0.5	0.5	0.5	0.5	0.5
plastics	0.2	0.2	0.2	0.2	0.2	0.2	0.2	0.2	0.2	0.2	0.2	0.23	0.26	0.29	0.32	0.35	0.38	0.41	0.44	0.47	0.5	0.5	0.5	0.5	0.5	0.5	0.5	0.5	0.5	0.5	0.5	0.5	0.5	0.5	0.5	0.5	0.5	0.5	0.5	0.5	0.5
other	0.1	0.1	0.1	0.1	0.1	0.1	0.1	0.1	0.1	0.1	0.1	0.14	0.18	0.22	0.26	0.3	0.34	0.38	0.42	0.46	0.5	0.5	0.5	0.5	0.5	0.5	0.5	0.5	0.5	0.5	0.5	0.5	0.5	0.5	0.5	0.5	0.5	0.5	0.5	0.5	0.5
Constant rates
automotive steel	0.264	0.264	0.264	0.264	0.264	0.264	0.264	0.264	0.264	0.264	0.264	0.264	0.264	0.264	0.264	0.264	0.264	0.264	0.264	0.264	0.264	0.264	0.264	0.264	0.264	0.264	0.264	0.264	0.264	0.264	0.264	0.264	0.264	0.264	0.264	0.264	0.264	0.264	0.264	0.264	0.264
stainless steel	0.41	0.41	0.41	0.41	0.41	0.41	0.41	0.41	0.41	0.41	0.41	0.41	0.41	0.41	0.41	0.41	0.41	0.41	0.41	0.41	0.41	0.41	0.41	0.41	0.41	0.41	0.41	0.41	0.41	0.41	0.41	0.41	0.41	0.41	0.41	0.41	0.41	0.41	0.41	0.41	0.41
cast iron	0.3	0.3	0.3	0.3	0.3	0.3	0.3	0.3	0.3	0.3	0.3	0.3	0.3	0.3	0.3	0.3	0.3	0.3	0.3	0.3	0.3	0.3	0.3	0.3	0.3	0.3	0.3	0.3	0.3	0.3	0.3	0.3	0.3	0.3	0.3	0.3	0.3	0.3	0.3	0.3	0.3
wrought Al	0.11	0.11	0.11	0.11	0.11	0.11	0.11	0.11	0.11	0.11	0.11	0.11	0.11	0.11	0.11	0.11	0.11	0.11	0.11	0.11	0.11	0.11	0.11	0.11	0.11	0.11	0.11	0.11	0.11	0.11	0.11	0.11	0.11	0.11	0.11	0.11	0.11	0.11	0.11	0.11	0.11
cast Al	0.85	0.85	0.85	0.85	0.85	0.85	0.85	0.85	0.85	0.85	0.85	0.85	0.85	0.85	0.85	0.85	0.85	0.85	0.85	0.85	0.85	0.85	0.85	0.85	0.85	0.85	0.85	0.85	0.85	0.85	0.85	0.85	0.85	0.85	0.85	0.85	0.85	0.85	0.85	0.85	0.85
copper electric grade	0.2	0.2	0.2	0.2	0.2	0.2	0.2	0.2	0.2	0.2	0.2	0.2	0.2	0.2	0.2	0.2	0.2	0.2	0.2	0.2	0.2	0.2	0.2	0.2	0.2	0.2	0.2	0.2	0.2	0.2	0.2	0.2	0.2	0.2	0.2	0.2	0.2	0.2	0.2	0.2	0.2
plastics	0.2	0.2	0.2	0.2	0.2	0.2	0.2	0.2	0.2	0.2	0.2	0.2	0.2	0.2	0.2	0.2	0.2	0.2	0.2	0.2	0.2	0.2	0.2	0.2	0.2	0.2	0.2	0.2	0.2	0.2	0.2	0.2	0.2	0.2	0.2	0.2	0.2	0.2	0.2	0.2	0.2
other	0.1	0.1	0.1	0.1	0.1	0.1	0.1	0.1	0.1	0.1	0.1	0.1	0.1	0.1	0.1	0.1	0.1	0.1	0.1	0.1	0.1	0.1	0.1	0.1	0.1	0.1	0.1	0.1	0.1	0.1	0.1	0.1	0.1	0.1	0.1	0.1	0.1	0.1	0.1	0.1	0.1
For more information on theis data has been derived please see:
https://doi.org/10.1111/jiec.13067

## Sheet: 8 reu
Assumed remanufacturing rates
	2010	2011	2012	2013	2014	2015	2016	2017	2018	2019	2020	2021	2022	2023	2024	2025	2026	2027	2028	2029	2030	2031	2032	2033	2034	2035	2036	2037	2038	2039	2040	2041	2042	2043	2044	2045	2046	2047	2048	2049	2050
Increasing rates
automotive steel	0.08	0.08	0.08	0.08	0.08	0.08	0.08	0.08	0.08	0.08	0.08	0.094	0.108	0.122	0.136	0.15	0.164	0.178	0.192	0.206	0.22	0.22	0.22	0.22	0.22	0.22	0.22	0.22	0.22	0.22	0.22	0.22	0.22	0.22	0.22	0.22	0.22	0.22	0.22	0.22	0.22
stainless steel	0.08	0.08	0.08	0.08	0.08	0.08	0.08	0.08	0.08	0.08	0.08	0.094	0.108	0.122	0.136	0.15	0.164	0.178	0.192	0.206	0.22	0.22	0.22	0.22	0.22	0.22	0.22	0.22	0.22	0.22	0.22	0.22	0.22	0.22	0.22	0.22	0.22	0.22	0.22	0.22	0.22
cast iron	0.12	0.12	0.12	0.12	0.12	0.12	0.12	0.12	0.12	0.12	0.12	0.131	0.142	0.153	0.164	0.175	0.186	0.197	0.208	0.219	0.23	0.23	0.23	0.23	0.23	0.23	0.23	0.23	0.23	0.23	0.23	0.23	0.23	0.23	0.23	0.23	0.23	0.23	0.23	0.23	0.23
wrought Al	0.11	0.11	0.11	0.11	0.11	0.11	0.11	0.11	0.11	0.11	0.11	0.127	0.144	0.161	0.178	0.195	0.212	0.229	0.246	0.263	0.28	0.28	0.28	0.28	0.28	0.28	0.28	0.28	0.28	0.28	0.28	0.28	0.28	0.28	0.28	0.28	0.28	0.28	0.28	0.28	0.28
cast Al	0.13	0.13	0.13	0.13	0.13	0.13	0.13	0.13	0.13	0.13	0.13	0.13	0.13	0.13	0.13	0.13	0.13	0.13	0.13	0.13	0.13	0.13	0.13	0.13	0.13	0.13	0.13	0.13	0.13	0.13	0.13	0.13	0.13	0.13	0.13	0.13	0.13	0.13	0.13	0.13	0.13
copper electric grade	0.1	0.1	0.1	0.1	0.1	0.1	0.1	0.1	0.1	0.1	0.1	0.113	0.126	0.139	0.152	0.165	0.178	0.191	0.204	0.217	0.23	0.23	0.23	0.23	0.23	0.23	0.23	0.23	0.23	0.23	0.23	0.23	0.23	0.23	0.23	0.23	0.23	0.23	0.23	0.23	0.23
plastics	0.09	0.09	0.09	0.09	0.09	0.09	0.09	0.09	0.09	0.09	0.09	0.097	0.104	0.111	0.118	0.125	0.132	0.139	0.146	0.153	0.16	0.16	0.16	0.16	0.16	0.16	0.16	0.16	0.16	0.16	0.16	0.16	0.16	0.16	0.16	0.16	0.16	0.16	0.16	0.16	0.16
other	0.1	0.1	0.1	0.1	0.1	0.1	0.1	0.1	0.1	0.1	0.1	0.115	0.13	0.145	0.16	0.175	0.19	0.205	0.22	0.235	0.25	0.25	0.25	0.25	0.25	0.25	0.25	0.25	0.25	0.25	0.25	0.25	0.25	0.25	0.25	0.25	0.25	0.25	0.25	0.25	0.25
Constant rates
automotive steel	0.08	0.08	0.08	0.08	0.08	0.08	0.08	0.08	0.08	0.08	0.08	0.08	0.08	0.08	0.08	0.08	0.08	0.08	0.08	0.08	0.08	0.08	0.08	0.08	0.08	0.08	0.08	0.08	0.08	0.08	0.08	0.08	0.08	0.08	0.08	0.08	0.08	0.08	0.08	0.08	0.08
stainless steel	0.08	0.08	0.08	0.08	0.08	0.08	0.08	0.08	0.08	0.08	0.08	0.08	0.08	0.08	0.08	0.08	0.08	0.08	0.08	0.08	0.08	0.08	0.08	0.08	0.08	0.08	0.08	0.08	0.08	0.08	0.08	0.08	0.08	0.08	0.08	0.08	0.08	0.08	0.08	0.08	0.08
cast iron	0.12	0.12	0.12	0.12	0.12	0.12	0.12	0.12	0.12	0.12	0.12	0.12	0.12	0.12	0.12	0.12	0.12	0.12	0.12	0.12	0.12	0.12	0.12	0.12	0.12	0.12	0.12	0.12	0.12	0.12	0.12	0.12	0.12	0.12	0.12	0.12	0.12	0.12	0.12	0.12	0.12
wrought Al	0.11	0.11	0.11	0.11	0.11	0.11	0.11	0.11	0.11	0.11	0.11	0.11	0.11	0.11	0.11	0.11	0.11	0.11	0.11	0.11	0.11	0.11	0.11	0.11	0.11	0.11	0.11	0.11	0.11	0.11	0.11	0.11	0.11	0.11	0.11	0.11	0.11	0.11	0.11	0.11	0.11
cast Al	0.13	0.13	0.13	0.13	0.13	0.13	0.13	0.13	0.13	0.13	0.13	0.13	0.13	0.13	0.13	0.13	0.13	0.13	0.13	0.13	0.13	0.13	0.13	0.13	0.13	0.13	0.13	0.13	0.13	0.13	0.13	0.13	0.13	0.13	0.13	0.13	0.13	0.13	0.13	0.13	0.13
copper electric grade	0.1	0.1	0.1	0.1	0.1	0.1	0.1	0.1	0.1	0.1	0.1	0.1	0.1	0.1	0.1	0.1	0.1	0.1	0.1	0.1	0.1	0.1	0.1	0.1	0.1	0.1	0.1	0.1	0.1	0.1	0.1	0.1	0.1	0.1	0.1	0.1	0.1	0.1	0.1	0.1	0.1
plastics	0.09	0.09	0.09	0.09	0.09	0.09	0.09	0.09	0.09	0.09	0.09	0.09	0.09	0.09	0.09	0.09	0.09	0.09	0.09	0.09	0.09	0.09	0.09	0.09	0.09	0.09	0.09	0.09	0.09	0.09	0.09	0.09	0.09	0.09	0.09	0.09	0.09	0.09	0.09	0.09	0.09
other	0.1	0.1	0.1	0.1	0.1	0.1	0.1	0.1	0.1	0.1	0.1	0.1	0.1	0.1	0.1	0.1	0.1	0.1	0.1	0.1	0.1	0.1	0.1	0.1	0.1	0.1	0.1	0.1	0.1	0.1	0.1	0.1	0.1	0.1	0.1	0.1	0.1	0.1	0.1	0.1	0.1
For more information on theis data has been derived please see:
https://doi.org/10.1111/jiec.13067

## Sheet: 9 ctax
Assumed carbon tax
	2010	2011	2012	2013	2014	2015	2016	2017	2018	2019	2020	2021	2022	2023	2024	2025	2026	2027	2028	2029	2030	2031	2032	2033	2034	2035	2036	2037	2038	2039	2040	2041	2042	2043	2044	2045	2046	2047	2048	2049	2050
2016 USD/t CO2	0	0	0	0	0	0	0	0	0	0	0	4.60364	9.20727	13.8109	18.4145	22.4427	27.0464	31.65	36.2536	40.8573	57.5455	62.1491	66.7527	71.3564	75.96	80.5636	85.1673	89.7709	94.3745	98.9782	103.582	108.185	112.789	117.393	121.996	126.6	131.204	135.807	140.411	145.015	149.618
1987 USD/kg C	0	0	0	0	0	0	0	0	0	0	0	0.008	0.016	0.024	0.032	0.039	0.047	0.055	0.063	0.071	0.1	0.108	0.116	0.124	0.132	0.14	0.148	0.156	0.164	0.172	0.18	0.188	0.196	0.204	0.212	0.22	0.228	0.236	0.244	0.252	0.26

[truncated: 12 more sheets: 10 feebate, 11 lw, 12 mpg, 13 prices, 14 vmt, 15 mat, 16 co2, 17 sust, 18 elec, 19 sales, 20 CO2km, 21 engy]
